# Supplementary material
Source: bioRxiv or medRxiv preprint supplement (https://medrxiv.org/highwire/filestream/72980/field_highwire_adjunct_files/3/2020.03.01.20029397-4.pdf)
Supplement: Supplementary file [file 2020.03.01.20029397-4.pdf]

重庆医科大学附属第二医院伦理委员会科研项目审查批件

2020年科伦审第(9)号

|                                                                                                                                                                                                                                       |           |                                        |             |                |     |
|---------------------------------------------------------------------------------------------------------------------------------------------------------------------------------------------------------------------------------------|-----------|----------------------------------------|-------------|----------------|-----|
| 审查项目名称                                                                                                                                                                                                                                |           | 重庆市 2019-nCov 肺炎患者流行病学和临床特征的多中心描述性回顾分析 |             |                |     |
| 科研课题来源                                                                                                                                                                                                                                |           | 自拟课题                                   |             |                |     |
| 申请科室                                                                                                                                                                                                                                  |           | 呼吸内科                                   | 主要研究者       |                | 王导新 |
| 审查方式                                                                                                                                                                                                                                  |           | 快速审查                                   |             |                |     |
| 审核文件                                                                                                                                                                                                                                  | 1.伦理审查申请表 |                                        | 3.研究者履历     |                |     |
|                                                                                                                                                                                                                                       | 2.临床研究方案  |                                        | 4.免知情知情同意申请 |                |     |
| 伦理委员                                                                                                                                                                                                                                  |           | 性别                                     | 专业及职称       | 单位             |     |
| 王大刚                                                                                                                                                                                                                                   |           | 男                                      | 管理 高级经济师    | 重庆医科大学附属第二医院   |     |
| 任红                                                                                                                                                                                                                                    |           | 男                                      | 内科学 教授      | 重庆医科大学附属第二医院   |     |
| 邓忠良                                                                                                                                                                                                                                   |           | 男                                      | 外科学 教授      | 重庆医科大学附属第二医院   |     |
| 胡怀东                                                                                                                                                                                                                                   |           | 男                                      | 内科学 主任医师    | 重庆医科大学附属第二医院   |     |
| 黄慧哲                                                                                                                                                                                                                                   |           | 男                                      | 生物化学 教授     | 重庆医科大学附属第二医院   |     |
| 沈薇                                                                                                                                                                                                                                    |           | 女                                      | 内科学 教授      | 重庆医科大学附属第二医院   |     |
| 杨刚毅                                                                                                                                                                                                                                   |           | 男                                      | 内科学 教授      | 重庆医科大学附属第二医院   |     |
| 熊正爱                                                                                                                                                                                                                                   |           | 女                                      | 妇产科学 教授     | 重庆医科大学附属第二医院   |     |
| 赵春景                                                                                                                                                                                                                                   |           | 男                                      | 药学 主任药师     | 重庆医科大学附属第二医院   |     |
| 林正伟                                                                                                                                                                                                                                   |           | 男                                      | 法学 高级律师     | 重庆市星全律师事务所     |     |
| 王静                                                                                                                                                                                                                                    |           | 女                                      | 社区代表主任科员    | 重庆市渝中区解放碑街道办事处 |     |
| 刘川                                                                                                                                                                                                                                    |           | 男                                      | 外科学 副教授     | 重庆医科大学附属第二医院   |     |
| 吴明珍                                                                                                                                                                                                                                   |           | 女                                      | 管理 委员       | 重庆医科大学附属第二医院   |     |
| 意见                                                                                                                                                                                                                                    | 同意        | 作必要的修正后同意                              | 不同意         | 终止或暂停已批准的试验    |     |
|                                                                                                                                                                                                                                       | ✓         |                                        |             |                |     |
| <p>1、审评意见：</p> <p>经伦理委员会审核，该项研究申请者所提交的材料齐全。参加该项目审查的伦理委员根据有关法律/法规、赫尔辛基宣言等伦理原则对该项目提交的文件进行了审核，认为符合相关法律/法规，经表决，同意该课题的科研设计内容，同意在我院开展本项研究。</p> <p style="text-align: right;">医院伦理委员会（盖章）</p> <p style="text-align: right;">日期：2020.2.26</p> |           |                                        |             |                |     |
